# Production of NO, N<sub>2</sub>O and N<sub>2</sub> by extracted soil bacteria, regulation by NO<sub>2</sub><sup>-</sup> and O<sub>2</sub> concentrations

Nicholas Morley<sup>1</sup>, Elizabeth M. Baggs<sup>1</sup>, Peter Dörsch<sup>2</sup> & Lars Bakken<sup>2</sup>

<sup>1</sup>School of Biological Sciences (Plant and Soil Science), University of Aberdeen, Aberdeen, UK; and <sup>2</sup>Institute for Plant and Environmental Sciences, Norwegian University of Life Sciences, Ås, Norway

**Correspondence:** Nicholas Morley, School of Biological Sciences (Plant and Soil Science), University of Aberdeen, Cruickshank Building, St Machar Drive, Aberdeen AB24 3UU, UK. Tel.: +44 0 1224 273642; fax: +44 0 1224 272703; e-mail: n.morley@abdn.ac.uk

Received 29 November 2007; revised 21 February 2008; accepted 12 March 2008.  
First published online 6 May 2008.

DOI:10.1111/j.1574-6941.2008.00495.x

Editor: Riks Laanbroek

## Keywords

aerobic denitrification; oxygen; nitrite; nitrous oxide; nitric oxide; dinitrogen.

## Abstract

The oxygen control of denitrification and its emission of NO/N<sub>2</sub>O/N<sub>2</sub> was investigated by incubation of Nycodenz-extracted soil bacteria in an incubation robot which monitors O<sub>2</sub>, NO, N<sub>2</sub>O and N<sub>2</sub> concentrations (in He+O<sub>2</sub> atmosphere). Two consecutive incubations were undertaken to determine (1) the regulation of denitrification by O<sub>2</sub> and NO<sub>2</sub><sup>-</sup> during respiratory O<sub>2</sub> depletion and (2) the effects of re-exposure to O<sub>2</sub> of cultures with fully expressed denitrification proteome. Early denitrification was only detected (as NO and N<sub>2</sub>O) at ≤ 80 μM O<sub>2</sub> in treatments with NO<sub>2</sub><sup>-</sup>, and the rates were three orders of magnitude lower than the rates observed after oxygen depletion (with N<sub>2</sub> as the primary product). When re-exposed to O<sub>2</sub>, the cultures continued to denitrify (8–55% of the rates during the foregoing anoxic phase), but its main product was N<sub>2</sub>O. The N<sub>2</sub>O reductase activity recovered as oxygen was being depleted. The results suggest that expression of the denitrifying proteome may result in significant subsequent aerobic denitrification, and this has profound implications for the understanding and modelling of denitrification and N<sub>2</sub>O emission. Short anoxic spells caused by transient flooding during rainfall, could lead to subsequent unbalanced aerobic denitrification, in which N<sub>2</sub>O is a major end product.

## Introduction

Denitrification is the sequential dissimilatory reduction of nitrate (NO<sub>3</sub><sup>-</sup>) to nitrite (NO<sub>2</sub><sup>-</sup>), nitric oxide (NO), nitrous oxide (N<sub>2</sub>O) and dinitrogen (N<sub>2</sub>) catalysed by nitrate reductases (NaR or Nap), nitrite reductase (NiR), nitric oxide reductase (NoR) and nitrous oxide reductase (N<sub>2</sub>OR), respectively (Zumft, 1997). Transient accumulation of intermediates (NO<sub>2</sub><sup>-</sup>, NO and N<sub>2</sub>O) is often observed at the onset of denitrification, which has been ascribed to enzyme kinetics, either alone (Betlach & Tiedje, 1981; Almeida *et al.*, 1997) or together with sequential gene expression (Philippot *et al.*, 2001; Bakken & Dörsch, 2007). Production of the intermediates NO and N<sub>2</sub>O is of concern because of their role in the destruction of stratospheric ozone (Badr & Probert, 1993) and because N<sub>2</sub>O is a potent greenhouse gas. Denitrification was traditionally thought to be inhibited in the presence of O<sub>2</sub> as O<sub>2</sub> is preferred over NO<sub>3</sub><sup>-</sup> as a terminal electron acceptor during respiration (Knowles, 1982; Lloyd, 1993). However, there is now

substantial evidence for the simultaneous respiration of O<sub>2</sub> and NO<sub>3</sub><sup>-</sup> by different genera of cultured bacteria within the *Alpha*-, *Beta*- and *Gammaproteobacteria*, confirming the occurrence of aerobic denitrification under both alternating oxic/anoxic phases and fully aerated conditions (Robertson & Kuenen, 1984; Lloyd *et al.*, 1987; Robertson *et al.*, 1989, 1995; Bonin & Gilewicz, 1991; Baumann *et al.*, 1996).

Specific investigations of aerobic denitrification have mainly employed pure cultures of bacterial strains isolated from soils (Lloyd *et al.*, 1987; Patureau *et al.*, 2000), marine sediments (Lloyd *et al.*, 1987) or wastewater treatment plants (Robertson & Kuenen, 1984; Takaya *et al.*, 2003). N<sub>2</sub>O and N<sub>2</sub> have been shown to be produced in bacterial cultures under O<sub>2</sub> concentrations ranging from near anoxic to *c.* 90% air saturation (Robertson & Kuenen, 1984; Körner & Zumft, 1989). The most studied denitrifying strain is *Paracoccus pantotrophus* (formerly *Thiosphaera pantotropha*) which can produce N<sub>2</sub>O and N<sub>2</sub> during corespiration of O<sub>2</sub> and NO<sub>3</sub><sup>-</sup> (Robertson & Kuenen, 1984; Bell & Ferguson, 1991). A periplasmic respiratory nitrate reductase (Nap) is

synthesized during aerobic growth of *P. pantotrophus* and is also expressed by this organism under anoxic conditions (Bell *et al.*, 1990), although 'anaerobic' denitrification generally proceeds via a membrane-bound (NaR) enzyme (Bell *et al.*, 1990; Sears *et al.*, 1993). All other enzymes involved in aerobic denitrification are believed to be the same as for anaerobic denitrification (Robertson & Kuenen, 1990).

Constitutive expression of NiR and NoR can be understood as a protective mechanism against cytotoxic concentrations of NO<sub>2</sub><sup>-</sup> and NO (Knowles, 1982). In contrast there appears to be no physiological gain from N<sub>2</sub>O reduction while O<sub>2</sub> is nonlimiting. In accordance with this there is evidence from culture experiments that N<sub>2</sub>O is the predominant end product of denitrification by most denitrifiers in the presence of O<sub>2</sub> (Otte *et al.*, 1996; Takaya *et al.*, 2003), with several culture studies having demonstrated higher ratios of N<sub>2</sub>O-to-N<sub>2</sub> with increased O<sub>2</sub> concentration. This has been attributed to a greater O<sub>2</sub> sensitivity of the N<sub>2</sub>O reductase (Hochstein *et al.*, 1984; Otte *et al.*, 1996), suggesting, if all other enzymatic rates are similar to the anaerobic process, that aerobic denitrification could be of major environmental significance as a source of N<sub>2</sub>O, especially if it is 'the rule rather than the exception' (Lloyd *et al.*, 1987).

Despite this mounting evidence, denitrification in soil is still considered as an anaerobic N-oxide reduction pathway, and modelled accordingly (Bakken & Dörsch, 2007). Here, we report on two experiments in which, for the first time, an indigenous soil bacterial community was used to investigate whether denitrification could proceed in the presence of O<sub>2</sub>. Such experiments are not feasible with intact soil or soil slurries, because anoxic microsites may occur in such systems despite an overall oxic environment. In the present experiment, we used well-dispersed bacterial cells extracted from soil by density gradient centrifugation (Bakken & Lindahl, 1995), and incubated them in a robotized incubation system which allows a monitoring of the oxygen concentration as well as of the net production of the three gaseous products of denitrification, NO, N<sub>2</sub>O and N<sub>2</sub> (Molstad *et al.*, 2007; Bergaust *et al.*, 2008).

The objectives were to determine, under controlled environmental conditions, the regulation of aerobic denitrification by changes in O<sub>2</sub> and NO<sub>2</sub><sup>-</sup> concentrations (Experiment 1) and to determine the kinetics of NO, N<sub>2</sub>O and N<sub>2</sub> production under transient changes in O<sub>2</sub> concentration (Experiment 2). NO<sub>2</sub><sup>-</sup> was hypothesized to be an important trigger for aerobic denitrification (Experiment 1) as it has previously been shown to induce NiR and N<sub>2</sub>OR (Körner & Zumft, 1989) and micro-aerobic denitrification in *Agrobacterium tumefaciens* (Bergaust *et al.*, 2008). Aerobic denitrification was hypothesized to be greater when switching from anoxic to oxic conditions (Experiment 2), driven by the nitrogen reductases synthesized during the anoxic phase (Körner & Zumft, 1989; Otte *et al.*, 1996). Because ammo-

nia-oxidizing bacteria (AOB) are able to produce N<sub>2</sub>O, both under oxic (Jiang & Bakken, 1999) and anoxic conditions (Shaw *et al.*, 2006), we included treatments with 10 Pa acetylene (C<sub>2</sub>H<sub>2</sub>) in the headspace to inhibit the metabolism of these bacteria. To our knowledge, there is no evidence that Crenarchaeal ammonia oxidation (Nicol *et al.*, 2006) differs from bacterial ammonia oxidation regarding sensitivity to C<sub>2</sub>H<sub>2</sub> (Hayatsu *et al.*, 2008).

## Materials and methods

### Extraction of bacteria from soil

To be able to identify the occurrence of aerobic denitrification, it is vital to adequately control environmental conditions, particularly the O<sub>2</sub> concentration the bacterial cells are exposed to. To facilitate this, bacteria were separated from soil particles, and incubated as dispersed stirred suspensions in gas-tight flasks. Peat soil, classified as a Sapric Histosol (FAO, 1998) was sampled from Fureneset in Fjaler (Western Norway). This soil had 400 m<sup>-3</sup> ha<sup>-1</sup> of shell sand mixed into the top 30 cm in 1978 and a pH of 7.1 (Sognnes *et al.*, 2006). Separation was undertaken by dispersion and subsequent density gradient (Nycodenz) centrifugation (7500 rev min<sup>-1</sup>, 2 h at 6 °C), according to the method of Bakken & Lindahl (1995). The method was slightly modified in that a density of 1.26 g mL<sup>-1</sup> (Nycodenz cushion) was used, based on preliminary experiments with varying densities of the Nycodenz cushion (1.18–1.31 g mL<sup>-1</sup>). We found that with the present organic soil, higher densities than 1.26 resulted in more impurities and the presence of a few cell aggregates (direct fluorescence microscopic counts of acridine orange stained cells), which were important to be avoided in this experiment. A density of 1.26 g mL<sup>-1</sup> eliminated this problem and a reasonable yield of cells (1.7 × 10<sup>9</sup> cells g<sup>-1</sup> soil, 7.5% of total numbers in the soil).

### Culture conditions and general incubation procedure

Culturing was done in sterile serum flasks (120 mL) with 50-mL liquid medium and teflon magnetic stirrers. The medium contained 25 mM HEPES buffer, 1.55 mM KH<sub>2</sub>PO<sub>4</sub>, 3 mM NH<sub>4</sub>SO<sub>4</sub><sup>-</sup>, 5 mM glucose, 2 mM KNO<sub>3</sub><sup>-</sup>, 1.76 mg L<sup>-1</sup> EDTA, 10 mg L<sup>-1</sup> ZnSO<sub>4</sub>, 5 mg L<sup>-1</sup> FeSO<sub>4</sub>, 1.5 mg L<sup>-1</sup> MnSO<sub>4</sub>, 0.4 mg L<sup>-1</sup> CuSO<sub>4</sub>, 0.25 mg L<sup>-1</sup> Co(NO<sub>3</sub>)<sub>2</sub>, 0.15 mg L<sup>-1</sup> H<sub>3</sub>BO<sub>3</sub>, 1 mg L<sup>-1</sup> nicotinic acid, 0.5 mg L<sup>-1</sup> thiamine and 1 mg L<sup>-1</sup> biotin. The pH of the medium was adjusted to 7.1 with 1 M NaOH. The flasks were capped with butyl-rubber septa and gas-tight aluminium crimp seals with a small amount of laboratory grease placed around the rim of the flask to further reduce any potential leaks. Flasks were repeatedly evacuated and filled with helium (He) (five cycles) under constant stirring to remove most background gases

from the water phase and headspace. Headspace O<sub>2</sub> concentration was adjusted by injecting O<sub>2</sub> (100% v/v) with a gas-tight syringe to achieve the desired initial incubation concentrations. The final overpressure in the flasks was released through a 16-mm needle attached to a syringe without a plunger. To prevent any external air entering the flask the syringe was filled with a few milliliters of water. The flasks were then inoculated by injecting 1.6 mL of the suspensions of extracted soil bacteria containing 10<sup>10</sup> cells (total microscopic counts), resulting in a final cell density of 2 × 10<sup>8</sup> cells mL<sup>-1</sup>, and incubated in the robotized incubation system described in detail by Molstad *et al.* (2007). In short, the system consists of a thermostated water bath (15 °C) with a submersible magnetic stirrer (Variomag HP15, H+P Labortechnik GmbH, Munich, Germany) for continuous stirring of 15 serum flasks. Headspace gas is sampled and analysed automatically by an autosampler (Gilson Model 222, Gilson, leBel France) and a Gilson Minipuls3 peristaltic pump attached to a MicroGC (Varian CP4900). The gas chromatograph (GC) has two columns; a 10 m poraPLOT U for N<sub>2</sub>O and CO<sub>2</sub> analysis (oven temperature 36 °C) and a 20 m 5 Å Molsieve (oven temperature 50 °C) for N<sub>2</sub> and O<sub>2</sub> analysis. The outlet of the GC injection loop is coupled to a T-piece junction with a continuous He flow, which carries sample gas further into the inlet of a chemiluminescence NO<sub>x</sub>-analyser (Model 200A, Advanced Pollution Instrumentation, San Diego, CA), for the determination of NO concentrations. After gas sampling, the peristaltic pump is reversed thus replacing the sampled gas with an equal volume of He. Thus, the sampling does not alter the headspace gas pressure, but leads to a significant dilution (3%) of the headspace gas. This dilution was taken into account when calculating rates of gas production. O<sub>2</sub> concentrations in the liquid are calculated as a function of measured O<sub>2</sub> transport rate from headspace to the liquid, and an empirically determined transport coefficient, as described below.

### Experimental conditions

Two experiments were undertaken. In the first, cultures were incubated with different initial headspace O<sub>2</sub> concentrations (0.1, 5.2 and 20 vol% O<sub>2</sub> in headspace; 1–2, 80 and 300 μM O<sub>2</sub> in liquid) and different concentrations of NO<sub>2</sub><sup>-</sup> (0, 0.1, 0.5 and 2 mM). Duplicates of the 5.2 vol% O<sub>2</sub> treatment were amended with C<sub>2</sub>H<sub>2</sub> (10 Pa), generated from calcium carbide, to inhibit any NO and N<sub>2</sub>O production from NH<sub>3</sub> oxidation. Headspace samples were taken automatically every 2 h over a 118-h period. In the second experiment the treatments with an initial O<sub>2</sub> level of 5.2 vol% were re-exposed to their initial O<sub>2</sub> (5.2 vol%, 80 μM) and NO<sub>2</sub><sup>-</sup> concentrations (0, 0.1, 0.5 and 2 mM NO<sub>2</sub><sup>-</sup>) once anoxic conditions had been achieved and all NO<sub>3</sub><sup>-</sup> and NO<sub>2</sub><sup>-</sup> had been reduced. To ensure ample amounts of carbon sub-

strates during this second incubation, 20 mL of the culture was removed and replenished with new medium (same component concentration as above). The flask was resealed with a new septum, flushed with He (repeated evacuation and filling as described above), adjusted to 5.2 vol% headspace O<sub>2</sub> concentration, refilled with 10 Pa C<sub>2</sub>H<sub>2</sub> (those which had C<sub>2</sub>H<sub>2</sub> during the first incubation), and incubated as previously in Experiment 1.

Initial traces of NO were detected in response of NO<sub>2</sub><sup>-</sup> additions, and we tested whether this could derive from chemical decomposition. Flasks were inoculated with autoclaved suspensions of soil bacteria (same concentrations as in the culture experiment), and incubated with and without 2 mM NO<sub>2</sub><sup>-</sup> and at two oxygen concentrations (near-zero and 5.2 vol% O<sub>2</sub>).

### Data analysis

Measured gas concentrations were corrected for dilution by He injection, and influx per injection and leaks through tubing and septa determined from parallel flasks with He atmosphere and sterile medium (see Molstad *et al.*, 2007 for details). This correction was necessary to obtain correct estimates of oxygen consumption and cumulative nitrogen-gas production. Published gas-solubility coefficients (Wilhelm *et al.*, 1977) were used to calculate the total amount of gas per flask (gas+liquid phase), assuming equilibrium between headspace and liquid, which is acceptable for all gases except oxygen (Molstad *et al.*, 2007). To obtain correct estimates of O<sub>2</sub> concentrations in the bulk liquid during oxygen depletion, the transport rate was taken into account. In theory, the O<sub>2</sub> transport between the liquid phase and the headspace is a function of the concentrations in the two phases, O<sub>2</sub> solubility, and a coefficient for transport of O<sub>2</sub> between the liquid and the headspace:

Transport between liquid and headspace

$$V = k_t \times (k_H \times P_{O_2} - [O_2]) \quad (1)$$

where  $V$  is the transport rate (mol O<sub>2</sub> s<sup>-1</sup>);  $k_t$  is the coefficient for transport from gas to liquid (L s<sup>-1</sup>);  $P_{O_2}$  is the O<sub>2</sub> partial pressure in headspace (atm);  $k_H$  is the solubility of O<sub>2</sub> in water (mol L<sup>-1</sup> atm<sup>-1</sup>);  $[O_2]$  is O<sub>2</sub> concentration in the liquid (mol L<sup>-1</sup>).  $k_t$  was determined previously to be 2.75 × 10<sup>-4</sup> L s<sup>-1</sup> for the conditions (temperature, liquid volume and stirring) used in the present experiment (Molstad *et al.*, 2007). Solving (1) for  $[O_2]$  gives  $[O_2] = k_H P_{O_2} - V/k_t$ , which was used to calculate the average O<sub>2</sub> concentration in the liquid for each time increment between two samplings (estimating  $V$  by the measured decline in  $P_{O_2}$ ).

For well-dispersed suspensions of single cells, the O<sub>2</sub> concentration at the cell surface is 90–98% of that in the bulk liquid (see Bergaust *et al.*, 2008 for details). This

condition was met at the onset of the first incubation of cells extracted from soil. In fact, the presence of flocculated cells was confirmed by visual inspection of the flasks at the end of the incubation experiment, although the majority of cells appeared to be well dispersed. Cells contained in aggregates could in theory experience much lower O<sub>2</sub> concentrations than that calculated for the bulk liquid.

Relative enzyme rates ( $\mu\text{mol N L}^{-1} \text{h}^{-1}$ ) for NiR, NoR and N<sub>2</sub>OR were calculated as follows:

$$\begin{aligned} \text{N}_2\text{OR} &= \frac{\Delta\text{N}_2}{t} \\ \text{NoR} &= \text{N}_2\text{OR} + \left(\frac{\Delta\text{N}_2\text{O}}{t}\right) \\ \text{NiR} &= \text{NoR} + \left(\frac{\Delta\text{NO}}{t}\right) \end{aligned}$$

where  $\Delta$  signifies the change in gas species ( $\mu\text{mol flask}^{-1}$ ) over time ( $t$ ).

## Results

### Experiment 1: NO, N<sub>2</sub>O and N<sub>2</sub> production with varying initial O<sub>2</sub> and NO<sub>2</sub><sup>-</sup> concentrations

In the treatments without NO<sub>2</sub><sup>-</sup> (Fig. 1), detectable accumulation of NO, N<sub>2</sub>O and N<sub>2</sub> occurred as O<sub>2</sub> was near to depletion in all treatments. In the treatments with initial O<sub>2</sub> at 80 and 300  $\mu\text{M}$ , detectable NO accumulation started as the O<sub>2</sub> concentration reached 7 and 10  $\mu\text{M}$ , respectively. In

the treatment with initial O<sub>2</sub> at 1–2  $\mu\text{M}$ , detectable NO accumulation started as O<sub>2</sub> reached 0.4–0.5  $\mu\text{M}$ . N<sub>2</sub>O accumulation coincided with that of NO, whereas detectable N<sub>2</sub> accumulation started *c.* 10 h later in all treatments.

The addition of 2 mM NO<sub>2</sub><sup>-</sup> (Fig. 2 vs. Fig. 1) clearly retarded O<sub>2</sub> consumption at low O<sub>2</sub> concentrations (Fig. 2a vs. 1a and Fig. 3), induced significant NO accumulation from time zero at the two lowest initial O<sub>2</sub> treatments and induced accumulation of N<sub>2</sub>O from time zero in the 1–2  $\mu\text{M}$  O<sub>2</sub> treatment (Fig. 2c). Thus, at the lowest initial O<sub>2</sub>, NO<sub>2</sub><sup>-</sup> induced a transient accumulation of NO (initial rates 1.5 nmol NO per flask h<sup>-1</sup>) and a sustained accumulation of N<sub>2</sub>O (*c.* 1 nmol N<sub>2</sub>O per flask h<sup>-1</sup>) throughout the first 80 h of incubation. In contrast, at 80  $\mu\text{M}$  initial O<sub>2</sub>, NO<sub>2</sub><sup>-</sup> induced an early but transient NO accumulation (initial rate *c.* 0.5 nmol NO per flask h<sup>-1</sup>). Thereafter neither NO nor N<sub>2</sub>O accumulation could be detected until O<sub>2</sub> reached the same low concentrations as for the treatments without NO<sub>2</sub><sup>-</sup> (5–10  $\mu\text{M}$ , Fig. 2).

Figure 3 allows a closer inspection of the effect of NO<sub>2</sub><sup>-</sup> at 80  $\mu\text{M}$  initial O<sub>2</sub>. First, it caused an initial transient aerobic NO accumulation, proportional with the NO<sub>2</sub><sup>-</sup> concentration (Fig. 3b). In contrast, initial NO accumulation (0–20 h) in flasks with sterilized suspensions of soil bacteria and 2 mM NO<sub>2</sub><sup>-</sup> was < 10% of that in the nonsterile cultures (results not shown). As found for the other oxygen treatments (Fig. 2 vs. Fig. 1), 2 mM NO<sub>2</sub><sup>-</sup> caused a retardation of oxygen consumption, whereas lower NO<sub>2</sub><sup>-</sup> concentrations did not (Fig. 3a). It also caused a similar retardation of the

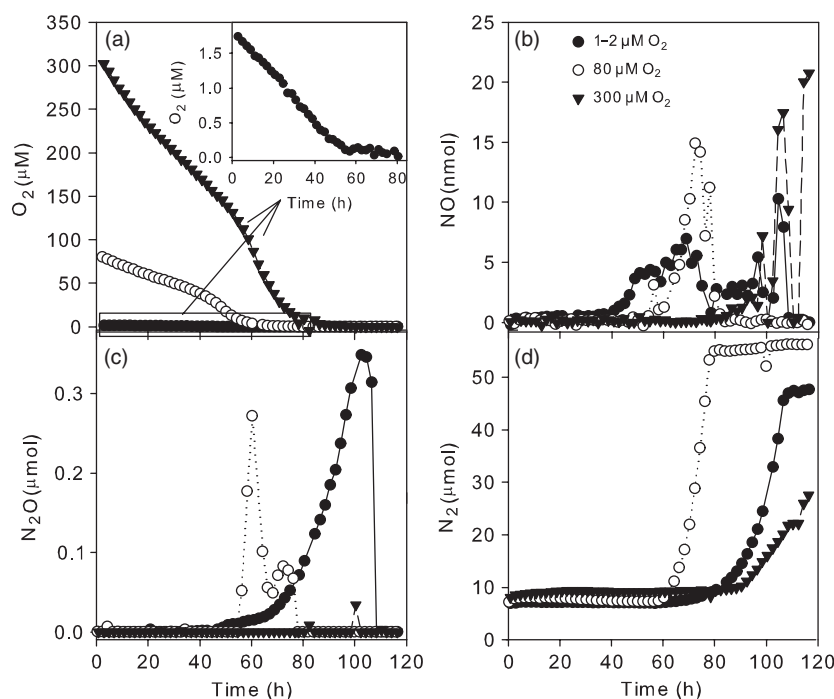

**Fig. 1.** First incubation of cells extracted from soil, medium without NO<sub>2</sub><sup>-</sup>. The graphs show oxygen concentrations in the liquid (a) and total amounts of nitrogen gases per flasks (b–d). The different initial oxygen treatments are indicated in the graph. All media contained 2 mM NO<sub>2</sub><sup>-</sup>.

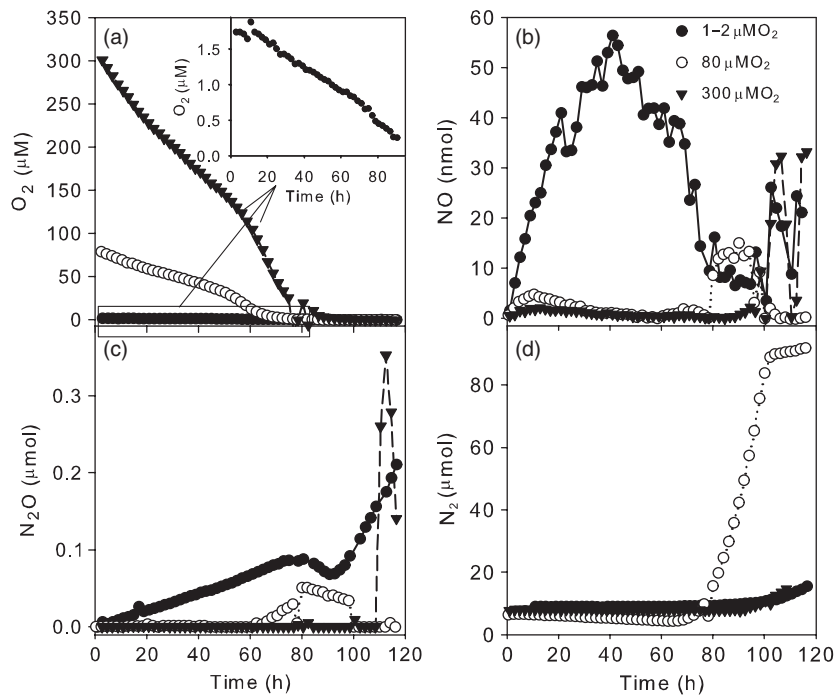

**Fig. 2.** First incubation of cells extracted from soil, medium with 2 mM  $\text{NO}_2^-$ . The graphs show oxygen concentrations in the liquid (a) and total amounts of nitrogen gases per flasks (b–d). The different initial oxygen treatments are indicated in the graph. All media contained 2 mM  $\text{NO}_3^-$  and 2 mM  $\text{NO}_2^-$ .

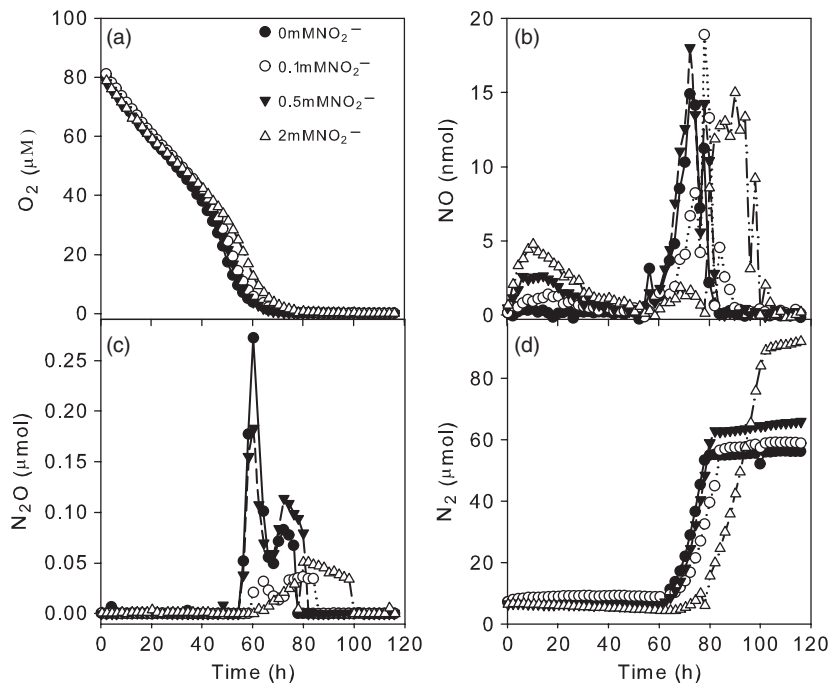

**Fig. 3.** First incubation, effects of varying concentrations of  $\text{NO}_2^-$ . Treatment with initial 80  $\mu\text{M}$   $\text{O}_2$  and no  $\text{C}_2\text{H}_2$ . The graphs show oxygen concentrations in the liquid (a) and total amounts of nitrogen gases per flasks (b–d). The different  $\text{NO}_2^-$  treatments are indicated in the graph.

appearance of both NO,  $\text{N}_2\text{O}$  and  $\text{N}_2$ . Detectable  $\text{N}_2$  production for all four treatments commenced 5–10 h later than NO and  $\text{N}_2\text{O}$  accumulation (Fig. 3d) and by the end of the incubation 90–97% of added N ( $\text{NO}_3^- + \text{NO}_2^-$ ) was recovered as  $\text{N}_2$ .

Once rapid denitrification was initiated, driven by  $\text{O}_2$  depletion, the products were completely dominated by  $\text{N}_2$ , and the rates were similar for all treatments: 2–3  $\mu\text{mol}$   $\text{N}_2$  per flask  $\text{h}^{-1}$ . These rates are three orders of magnitude higher than the detected net rates of NO and/or

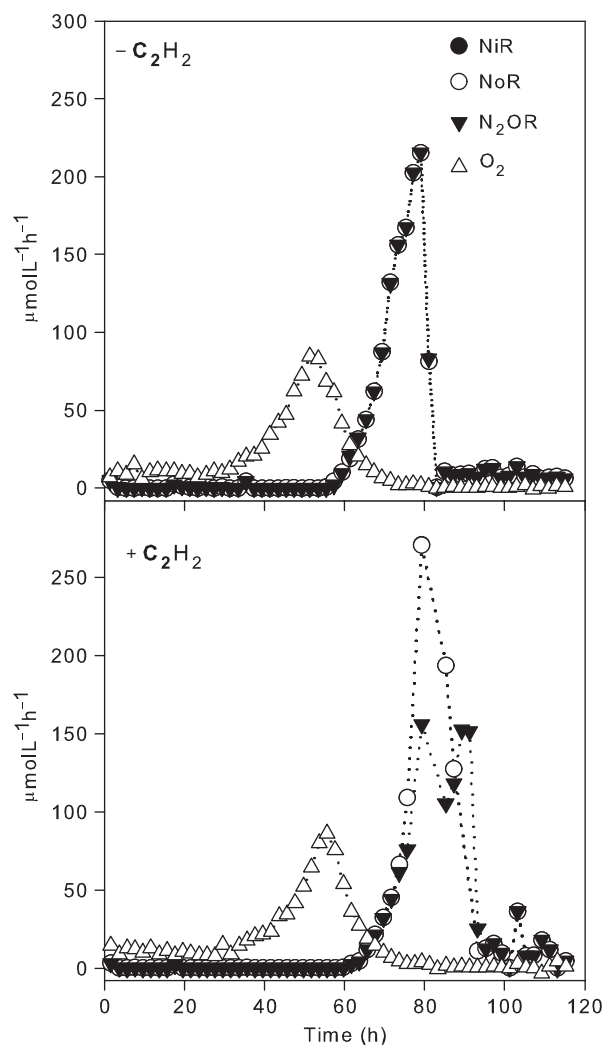

**Fig. 4.** Effects of 10 Pa C<sub>2</sub>H<sub>2</sub> during the first incubation of extracted cells. The graphs show the estimated rates of reduction of the different electron acceptors ( $\mu\text{mol O}_2 \text{L}^{-1} \text{h}^{-1}$  and  $\mu\text{mol NL}^{-1} \text{h}^{-1}$  for the nitrogen species) for incubation with and without 10 Pa C<sub>2</sub>H<sub>2</sub> in headspace (indicated in graphs). Initial O<sub>2</sub> was 5.2 vol% in headspace, the medium contained 2 mM NO<sub>3</sub><sup>-</sup> and 0.5 mM NO<sub>2</sub><sup>-</sup>. NiR, rate of NO<sub>2</sub><sup>-</sup> reduction to NO; NoR, rate of NO reduction to N<sub>2</sub>O; N<sub>2</sub>OR, rate of N<sub>2</sub>O reduction to N<sub>2</sub>; O<sub>2</sub>, rate of O<sub>2</sub>-reduction.

N<sub>2</sub>O accumulation in the various treatments during the first aerobic part of the incubation.

For all the treatments in which N<sub>2</sub> accumulation reached a plateau (Figs 1d, 2d and 3d), the final N<sub>2</sub> accumulation accounted for 90–97% of the added NO<sub>3</sub><sup>-</sup> or NO<sub>2</sub><sup>-</sup>. In general, the transient accumulation of NO and N<sub>2</sub>O was marginal compared with the production of N<sub>2</sub>. This implies that throughout the entire period with active denitrification, most of the NO<sub>3</sub><sup>-</sup> or NO<sub>2</sub><sup>-</sup> was efficiently reduced to N<sub>2</sub>, i.e. the rates of NO and N<sub>2</sub>O reduction were almost equal to the rate of NO<sub>2</sub><sup>-</sup> reduction. This is illustrated in Fig. 4,

which shows the estimated rates of O<sub>2</sub> and N-oxide reduction in the 80  $\mu\text{M O}_2$  treatment with 2 mM NO<sub>3</sub><sup>-</sup> and 0.5 mM NO<sub>2</sub><sup>-</sup>, with and without 10 Pa C<sub>2</sub>H<sub>2</sub> in the headspace. The O<sub>2</sub> respiration peaked around 50 h for both treatments, then declined with corresponding increases in rates of the N-oxide reductases. In the absence of C<sub>2</sub>H<sub>2</sub>, the rates of NO and N<sub>2</sub>O reduction (NoR and N<sub>2</sub>OR) were practically equal to the rates of NO production (NiR) during active denitrification, thus the three curves shown in Fig. 4 are identical (hence seen as a single graph). In the presence of 10 Pa C<sub>2</sub>H<sub>2</sub>, however, N<sub>2</sub>O reduction appeared to be partly inhibited during the mid-phase of the most active denitrification, i.e. NO reduction rates significantly exceeded the rate of N<sub>2</sub>O reduction. This reflected a higher transient N<sub>2</sub>O accumulation in the presence of 10 Pa C<sub>2</sub>H<sub>2</sub> (16–31  $\mu\text{mol N}_2\text{O}$  per flask, data not shown).

The NO concentrations in the liquid can be calculated from the data presented in Figs 1–3; 1 nmol NO per flask is equivalent to 0.75 nM NO in the liquid. Thus, NO concentrations were typically in the 5–30 nM range during active denitrification.

### Experiment 2: Re-exposure to 80 $\mu\text{M O}_2$

Here, the cultures which had been incubated with initial 5.2 vol% O<sub>2</sub> in headspace (80  $\mu\text{M O}_2$ ) in Experiment 1 were re-exposed to 5.2 vol% in headspace, 2 mM NO<sub>3</sub><sup>-</sup> and 0, 0.1, 0.5 or 2 mM NO<sub>2</sub><sup>-</sup> (20 mL of the culture was removed and replaced with fresh medium, thus the initial cell density was 60% of that at the end of Experiment 1). Respiration depleted O<sub>2</sub> at nearly constant rate until reaching 20  $\mu\text{M}$  (Figs 5a and 6a). During this oxic phase, NO concentrations fluctuated between 4 and 10 nmol per flask (i.e. 1–7 nM in the liquid) which was significantly lower than the initial NO accumulation in Experiment 1 (Fig. 2b). As the O<sub>2</sub> was depleted, the NO concentrations increased rapidly. Higher levels were reached in the treatments without C<sub>2</sub>H<sub>2</sub> (40–140 nmol per flask), compared with that in the flasks with 10 Pa C<sub>2</sub>H<sub>2</sub> (20–50 nmol per flask), and for both treatments the levels increased with increasing concentrations of NO<sub>2</sub><sup>-</sup> (Figs 5b and 6b). The N<sub>2</sub>O accumulation started from the very beginning of the incubation, and peaked at high levels (4–12  $\mu\text{mol N}_2\text{O}$  per flask) before O<sub>2</sub> was depleted. The peak concentrations varied between treatments, and were not systematically related to the NO<sub>2</sub><sup>-</sup> concentrations nor to the presence/absence of C<sub>2</sub>H<sub>2</sub> in the headspace. At the onset of anoxic conditions, N<sub>2</sub>O was efficiently reduced to zero in the treatments with C<sub>2</sub>H<sub>2</sub> (Fig. 6), whereas it increased in the absence of C<sub>2</sub>H<sub>2</sub> (with one exception). The N<sub>2</sub> accumulation rate was moderate through the first 20 h of the oxic phase (0.15–0.47  $\mu\text{mol N}_2 \text{h}^{-1}$  per flask), and then increased gradually as O<sub>2</sub> was being depleted. The response pattern is more clearly visible

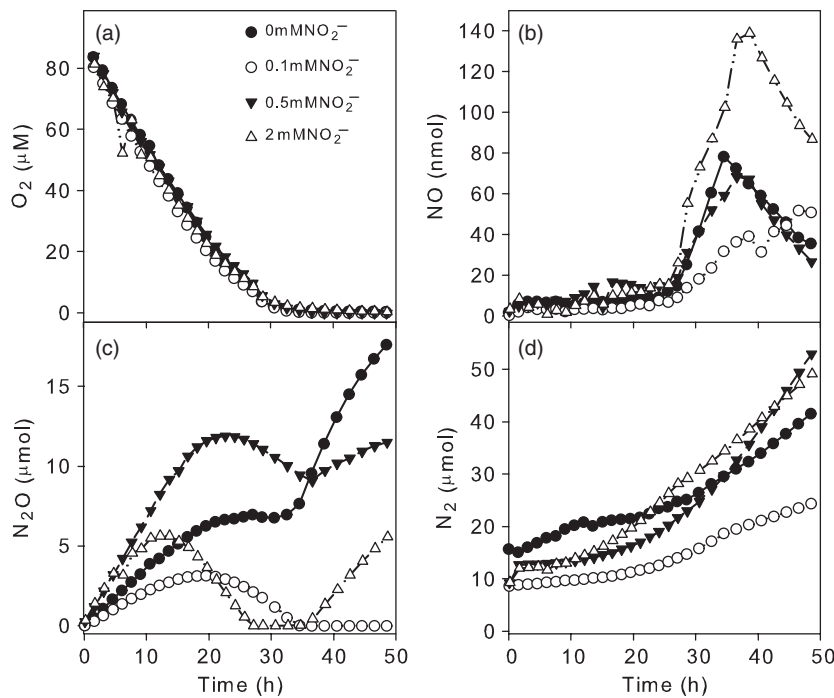

**Fig. 5.** Second incubation. Cell suspensions from the first incubation, during which oxygen was depleted, were amended with fresh medium and a new dose of  $\text{O}_2$ , and the original concentrations of  $\text{NO}_3^-$  and  $\text{NO}_2^-$  were restored. Results for treatments without  $\text{C}_2\text{H}_2$ . Graphs are equivalents to those in Figs 1–3. Treatments are indicated in the graph. Each culture was exposed to the same initial concentration of  $\text{O}_2$  and  $\text{NO}_2^-$  as it experienced in the first incubation.

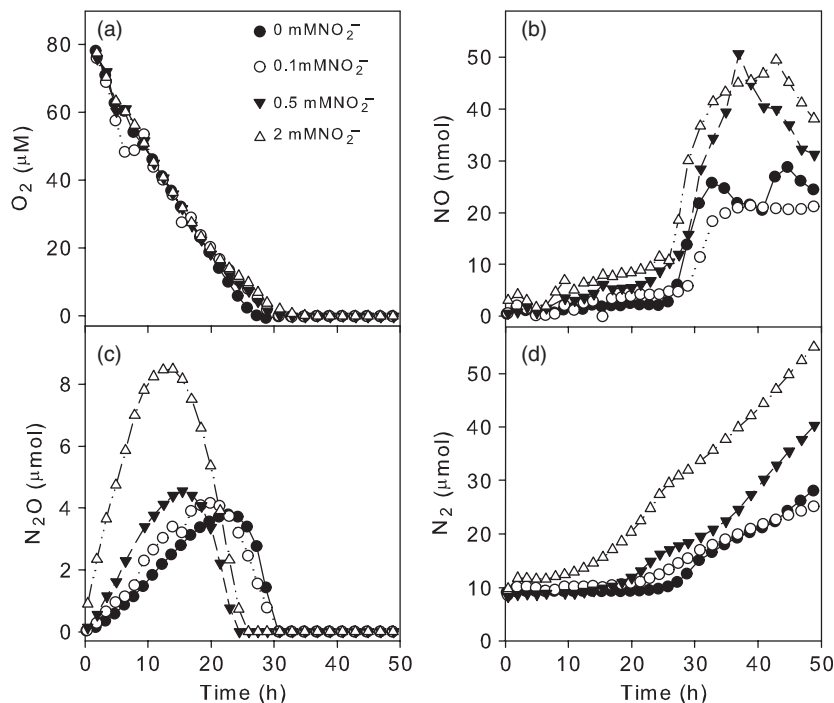

**Fig. 6.** Second incubation. Treatments equivalent to Fig. 5, but with 10 Pa  $\text{C}_2\text{H}_2$  in headspace.

in Fig. 7, where the rates of  $\text{O}_2$  and N-oxide reduction are shown. The rates of  $\text{NO}_2^-$  reduction to  $\text{NO}$  (NiR) are not visible because it practically equals that of  $\text{NO}$  reduction to  $\text{N}_2\text{O}$ . The rates of  $\text{N}_2\text{O}$  reduction to  $\text{N}_2$  ( $\text{N}_2\text{OR}$ ), however, were lower than that of NiR and NoR during the first 20 h of

the oxic phase in both treatments (i.e. with and without 10 Pa  $\text{C}_2\text{H}_2$ ) (Fig. 7). The estimated  $\text{N}_2\text{OR}$  activity was strongly negatively correlated with the bulk concentration of oxygen ( $r = -0.94$ ,  $P < 0.01$ ). The  $\text{O}_2$  respiration rates peaked at around 30 h, for both treatments, then declined rapidly.



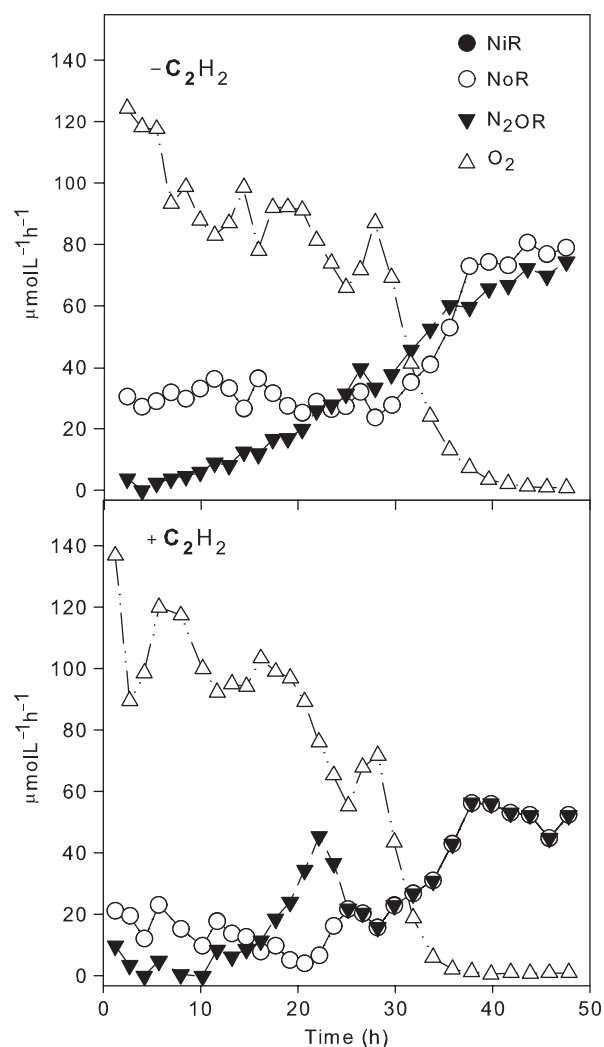

**Fig. 7.** Effects of 10 Pa C<sub>2</sub>H<sub>2</sub> during the second incubation of extracted cells. The graphs show the estimated rates of reduction of the different electron acceptors ( $\mu\text{mol O}_2 \text{L}^{-1} \text{h}^{-1}$  and  $\mu\text{mol N}_2 \text{L}^{-1} \text{h}^{-1}$  for the nitrogen species) for incubation with and without 10 Pa C<sub>2</sub>H<sub>2</sub> in headspace (indicated in graphs). Initial O<sub>2</sub> was 5.2 vol% in headspace, the medium contained 2 mM NO<sub>3</sub><sup>-</sup> and 0.5 mM NO<sub>2</sub><sup>-</sup>. NiR, rate of NO<sub>2</sub><sup>-</sup> reduction to NO; NoR, rate of NO reduction to N<sub>2</sub>O; N<sub>2</sub>OR, rate of N<sub>2</sub>O reduction to N<sub>2</sub>; O<sub>2</sub>, rate of O<sub>2</sub> reduction.

The denitrification rates under oxic conditions (Figs 5 and 6), estimated as the sum of NoR and N<sub>2</sub>OR activity (i.e. the net accumulation rate of N<sub>2</sub> plus that of N<sub>2</sub>O), ranged from 0.2–1  $\mu\text{mol N}_2\text{O} + \text{N}_2$  per flask h<sup>-1</sup>. In comparison, the maximum denitrification rates during the preceding anoxic phase (Figs 1 and 2) were 3–4  $\mu\text{mol N}_2$  per flask h<sup>-1</sup> (N<sub>2</sub>O was insignificant in this case). For a true comparison of these rates, however, we must take into account that the cell density was reduced with 40% before the secondary oxic phase (20 mL culture volume was removed and replaced with fresh medium). Thus, we should compare rates of

1.8–2.4  $\mu\text{mol N}_2\text{O} + \text{N}_2$  per flask h<sup>-1</sup> in the first anoxic phase with 0.2–1  $\mu\text{mol N}_2\text{O} + \text{N}_2$  per flask h<sup>-1</sup> during the following oxic phase. Thus, the measured denitrification rates during the secondary oxic phase were 8–55% of the maximum rates during the preceding anoxic phase.

## Discussion

### Denitrification in cells not previously exposed to anoxia

A prerequisite for identifying aerobic denitrification, *sensu stricto*, is to precisely know the O<sub>2</sub> concentration at the bacterial cell surface. However, if cells aggregate, there is uncertainty whether strictly uniform O<sub>2</sub> tensions have been maintained throughout the culture. In our experiments we can only be certain that all cells were fully exposed to O<sub>2</sub> during initial incubation (0–20 h), as later on the possibility of cell aggregation could not be excluded. Hence, some cells could be experiencing lower O<sub>2</sub> concentrations than in the bulk liquid. Therefore, caution is required in the interpretation of N-oxide production later on during the incubation while O<sub>2</sub> was still present in the liquid.

The early (0–20 h) NO accumulation in proportion to the NO<sub>2</sub><sup>-</sup> concentration at 80  $\mu\text{M O}_2$  (Figs 2b and 3b) could in theory be due to chemical decomposition of NO<sub>2</sub><sup>-</sup> rather than biological (Conrad, 1996). However, the early NO accumulations in flasks with sterilized suspensions of soil bacteria was < 10% of that in nonsterile ones (at the same oxygen and NO<sub>2</sub><sup>-</sup> concentration). NO emission in response to NO<sub>2</sub><sup>-</sup> addition to autoclaved soil is normally found to be higher than that in response to NO<sub>2</sub><sup>-</sup> addition to nonsterile soil (Conrad, 1996). Thus, there is strong evidence that the early NO accumulation observed is biological, and could be taken as an indication of aerobic denitrification *sensu stricto*. It appears, however, that only NiR was active, because only NO was detected. It cannot be excluded that both NoR and N<sub>2</sub>OR became active as well (thus causing the observed depletion of NO), without being detected as an increase in N<sub>2</sub>O and N<sub>2</sub> since the detection limit for N<sub>2</sub>O and N<sub>2</sub> accumulation is much higher than that for NO (approximate detection limits are 150–200 nmol N<sub>2</sub> per flask, 2.5 nmol N<sub>2</sub>O per flask and 1 nmol NO per flask, Molstad *et al.*, 2007). The rate of NO accumulation suggests a NiR activity of 0.7 nmol NO per flask h<sup>-1</sup> in the 2 mM NO<sub>2</sub><sup>-</sup> treatment (Fig. 3), and possibly somewhat higher if NoR and N<sub>2</sub>OR were active from the very beginning of the incubation. The absence of NO accumulation in the treatment without NO<sub>2</sub><sup>-</sup> could be taken as a proof for the absence of NaR, but is probably not. A low NaR activity (similar to the apparent NiR activity) would not produce high enough NO<sub>2</sub><sup>-</sup> concentrations to induce the observed NO accumulation.



Thus, we tentatively conclude that the experiment demonstrates that millimolar concentrations of  $\text{NO}_2^-$  can induce a low denitrification rate at a moderately high  $\text{O}_2$  concentration (5.2 vol%, 80  $\mu\text{M}$ ), but not at full aeration (300  $\mu\text{M}$ ). A similar observation was made with cultures of *A. tumefaciens*, where 2 mM  $\text{NO}_2^-$  induced an onset of NO accumulation as the  $\text{O}_2$  concentration reached below 17  $\mu\text{M}$  (Bergaust *et al.*, 2008). We hesitate to use the term aerobic denitrification, however. The original idea of aerobic denitrification is that it would occur even at full aeration (Robertson & Kuenen, 1984; Lloyd *et al.*, 1987). This was clearly not the case here (Fig. 2b).

At a later stage of the incubation, high denitrification rates were initiated as some  $\text{O}_2$  was still present (7–10  $\mu\text{M}$ , i.e. equivalent to 2–3% of full aeration), with or without  $\text{NO}_2^-$  present (Fig. 3). However, at this stage of the incubation cell aggregates were visibly present, hence the observed denitrification in the presence of oxygen could have been taking place in localized microsites with reduced  $\text{O}_2$ .

The treatment with initially near-zero oxygen concentrations (1–2  $\mu\text{M}$ , Figs 1 and 2) is somewhat perplexing at first sight: in the absence of  $\text{NO}_2^-$ , no denitrification occurred during the first 40 h of incubation, through which the  $\text{O}_2$  concentration dropped from 1.8 to 0.5  $\mu\text{M}$ . This could be taken as evidence that < 1  $\mu\text{M}$   $\text{O}_2$  is necessary for induction of denitrification, but is probably not. It seems more likely that the transcription of denitrification gene was initiated at the very beginning of the incubation at 1–2  $\mu\text{M}$   $\text{O}_2$ . If so, however, we should expect detectable denitrification within 1–2 h, based on observed expression kinetics in denitrifying bacteria (see for instance Härtig & Zumft, 1999). The fact that it took 40 h rather than 1–2 h could be explained by near absence of constitutive Nar, because this would result in severe energy limitation due to limited electron flow (as oxygen was abruptly lowered to 1–2  $\mu\text{M}$ ). This energy limitation would be relieved when a minimum of NaR is produced. In contrast,  $\text{NO}_2^-$  induced an immediate onset of denitrification at the lowest initial  $\text{O}_2$  concentration treatment when concentrations were 1.7  $\mu\text{M}$ . Taken together, these results suggest that NiR is constitutively expressed at a much higher level than NaR. This corroborates the interpretations above regarding  $\text{NO}_2^-$  effects on the early NO accumulation in the treatments with initially 5.2 vol%. Equivalent indirect evidence for low/zero constitutive expression of NaR in denitrifying bacteria has been found other studies as well (Højberg *et al.*, 1997; Bergaust *et al.*, 2008), warranting more focused studies of this phenomenon in the future.

In summary, the presence of  $\text{NO}_2^-$  in our extracted cells induced detectable denitrification rates under micro-oxic, whereas  $\text{NO}_3^-$  did not. This may reflect constitutive expres-

sion of NiR, which has been reported for denitrifying bacteria isolated from soil (Ka *et al.*, 1997), and previous findings that the *cd<sub>1</sub>*-type nitrite reductase can remain active in the presence of molecular oxygen (Ferguson, 1994). Constitutive expression of NiR might be an advantage by protecting against toxic spikes of  $\text{NO}_2^-$  (detoxification). It may also help the organisms to survive during rapid transition from oxic to anoxic conditions, because it may provide the necessary minimum of energy (provided that traces of  $\text{NO}_2^-$  are present) to express the entire denitrification proteome.

### Denitrification under oxic conditions following anoxic conditions

During anaerobic respiration (Experiment 1) the entire denitrification pathway was active and the reductases NiR, NoR and  $\text{N}_2\text{OR}$  were almost in a state of equilibrium. Upon switching back from anoxic to oxic conditions, active denitrification occurred, amounting to 8–55% of the activity observed during the preceding anoxic phase (see calculations in Results). All denitrification enzymes were active during this oxic phase, but  $\text{N}_2\text{OR}$  was clearly more severely inhibited by oxygen than the other enzymes (NaR, NiR and NoR).

This sustained denitrification at 80  $\mu\text{M}$   $\text{O}_2$  is no proof of aerobic denitrification *sensu stricto*, because an unknown fraction of the activity may have taken place in cell aggregates with lower interior  $\text{O}_2$  concentrations than that in the bulk liquid. Nevertheless, there must have been a substantial part of cells that were fully exposed to  $\text{O}_2$  such as any free cells in the media and cells on the outer edge of bacterial aggregates. It seems likely, therefore, that at least a fraction of the community sustained denitrification despite being exposed to 80  $\mu\text{M}$   $\text{O}_2$ , but that their  $\text{N}_2\text{OR}$  activity was more inhibited by  $\text{O}_2$  than the other reductases. As  $\text{O}_2$  was being depleted the rates of  $\text{N}_2\text{O}$  reduction gradually recovered, either by reactivating existing enzymes or *de novo* enzyme synthesis of  $\text{N}_2\text{OR}$ .

Here we observed the composite response of bacteria extracted from a soil microbial community within which the different reductases can be expected to differ in terms of their regulatory mechanisms, sensitivity of  $\text{N}_2\text{O}$  reductases to  $\text{O}_2$ , or possession of mechanisms to protect the enzymes against  $\text{O}_2$  (Bell & Ferguson, 1991). For example, while the  $\text{N}_2\text{O}$  reductase of *P. pantotrophus* has been shown to be active and stable in the presence of  $\text{O}_2$  enabling aerobic denitrification to proceed effectively to  $\text{N}_2$  (Berks *et al.*, 1993), the  $\text{N}_2\text{OR}$  of *Alcaligenes faecalis* and *Paracoccus denitrificans* appear to be more sensitive to  $\text{O}_2$  (Baumann *et al.*, 1996; Otte *et al.*, 1996). Thus possession of an active  $\text{N}_2\text{O}$  reductase in oxic conditions appears to be organism dependent.

## Microbial source of gaseous nitrogen

Ammonia oxidation was expected to be an insignificant source of NO or N<sub>2</sub>O in the present experiments due to low extraction efficiency of ammonia oxidizers (AO, be it Bacteria or Archaea or both) in Nycodenz, which is up to 10-fold lower compared with heterotrophic bacteria (Aakra *et al.*, 2000). Nevertheless, we included treatments with 10 Pa C<sub>2</sub>H<sub>2</sub>, in order to check this contribution. The results prove that ammonia oxidation was an insignificant source of N<sub>2</sub>O during the oxic phase, as judged by the absence of any C<sub>2</sub>H<sub>2</sub> effect on gas production (Fig. 7). Ammonia oxidation cannot possibly have been significant during the first anoxic phase either, as judged by the higher N<sub>2</sub>O accumulation rate with than without C<sub>2</sub>H<sub>2</sub> (Fig. 4). The only result which could be taken as an evidence for a significant role of AO is the higher N<sub>2</sub>O production rate in the absence than in the presence of 10 Pa C<sub>2</sub>H<sub>2</sub> during the second anoxic phase (Fig. 5 vs. Fig. 6). If this difference was due to AO, however, this source of N<sub>2</sub>O would require a massive presence of AO in the cultures, which seems unlikely as judged by their insignificance during the foregoing incubation. We are more inclined to believe that the positive effect of C<sub>2</sub>H<sub>2</sub> on the relative N<sub>2</sub>OR activity during the second incubation could be ascribed to an overexpression during the late phase of the first anoxic period in the presence of C<sub>2</sub>H<sub>2</sub>, due to its apparent partial inhibition of N<sub>2</sub>OR. Partial inhibition of N<sub>2</sub>OR by 10 Pa C<sub>2</sub>H<sub>2</sub> is not unlikely, although the concentration is three orders of magnitude lower than that used to achieve complete inhibition in the C<sub>2</sub>H<sub>2</sub> inhibition assay of denitrification. We acknowledge that this is only a speculative interpretation of the somewhat surprising effect of C<sub>2</sub>H<sub>2</sub> during the late anoxic phase. However, whatever the mechanism is, it hardly alters the main conclusions regarding oxygen regulation of denitrification and the relative activity of N<sub>2</sub>OR.

We acknowledge that cell extraction on Nycodenz may be biased; cells in deep cavities and cells embedded in firm organic materials are less likely to be extracted than loosely attached cells in macropores. Such loosely attached cells in macropores are probably experiencing shorter and more infrequent anoxic spells than the deeply embedded cell. Hence, bacteria from the most oxic microenvironments could be overrepresented in the bacterial fraction. This question could be addressed by studying sequential extraction of cells, as done by Almås *et al.* (2005).

## Conclusions

The experiment shows that aerobic denitrification in this soil-derived community is insignificant without prior exposure to an anoxic phase. The role of NO<sub>2</sub><sup>-</sup> as an inducer of aerobic denitrification is unclear. Cells which are exposed to short anoxic periods, for instance created by flooding and

subsequent drainage will probably keep on denitrifying even once the O<sub>2</sub> supply is partly or fully restored. And this aerobic/microaerobic denitrification would be a much stronger N<sub>2</sub>O emitter than that occurring during anoxia, due to the apparently high O<sub>2</sub> inactivation of N<sub>2</sub>OR. More soils should be tested to confirm the community response we observed. Our results are of significance to soil N<sub>2</sub>O emission models, which do not explicitly include the inhibition of N<sub>2</sub>O reductase by O<sub>2</sub> and the unbalanced denitrification process as a result of O<sub>2</sub> fluctuations.

## Acknowledgements

This work was funded in part by a COST action 856 short-term scientific mission enabling experimental work to be undertaken by N.M. at Ås, and by an Agri-Food Committee studentship awarded by the Biotechnology and Biological Sciences Research Council, UK.

## References

- Aakra Å, Hesselsoe M & Bakken LR (2000) Surface attachment of ammonia-oxidizing bacteria in soil. *Microb Ecol* **39**: 222–235.
- Almås ÅR, Mulder J & Bakken LR (2005) The trace metal exposure of soil bacteria depends on their position in the soil matrix. *Environ Sci Technol* **39**: 5927–5932.
- Almeida JS, Reis MAM & Carrondo MJT (1997) A unifying kinetic model of denitrification. *J Theoret Biol* **186**: 241–249.
- Badr O & Probert SD (1993) Environmental impacts of atmospheric nitrous-oxide. *Appl Energy* **44**: 197–231.
- Bakken LR & Dörsch P (2007) Nitrous oxide emission and global changes: modelling approaches. *Biology of the Nitrogen Cycle* (Bothe H, Ferguson SJ & Newton WE, eds), pp. 381–395. Elsevier, Amsterdam.
- Bakken LR & Lindahl V (1995) Recovery of bacterial cells from soil. *Nucleic Acids in the Environment Methods and Applications* (Trevors JT & van Elsas JD, eds), pp. 9–27. Springer-Verlag, Berlin.
- Baumann B, Snozzi M, Zehnder AJB & VanderMeer JR (1996) Dynamics of denitrification activity of *Paracoccus denitrificans* in continuous culture during aerobic–anaerobic changes. *J Bacteriol* **178**: 4367–4374.
- Bell LC & Ferguson SJ (1991) Nitric and nitrous oxide reductases are active under aerobic conditions in cells of *Thiosphaera pantotropha*. *Biochem J* **273**: 423–427.
- Bell LC, Richardson DJ & Ferguson SJ (1990) Periplasmic and membrane-bound respiratory nitrate reductases in *Thiosphaera pantotropha* – the periplasmic enzyme catalyzes the 1st step in aerobic denitrification. *FEBS Lett* **265**: 85–87.
- Bergaust L, Shapleigh J, Frostegård Å & Bakken L (2008) Transcription and activities of NO<sub>x</sub> reductases in *Agrobacterium tumefaciens*: the influence of nitrate, nitrite and oxygen availability. *Environ Microbiol* doi: 10.1111/j.1462-2920.2007.01557.x.

- Berks BC, Baratta D, Richardson DJ & Ferguson SJ (1993) Purification and characterization of a nitrous-oxide reductase from *Thiosphaera pantotropha* - implications for the mechanism of aerobic nitrous-oxide reduction. *FEBS J* **212**: 467–476.
- Betlach MR & Tiedje JM (1981) Kinetic explanation for accumulation of nitrite, nitric oxide, and nitrous oxide during bacterial denitrification. *Appl Environ Microbiol* **42**: 1074–1084.
- Bonin P & Gilewicz M (1991) A direct demonstration of “co-respiration” of oxygen and nitrogen oxides by *Pseudomonas nautica*: some spectral and kinetic properties of the respiratory components. *FEMS Microbiol Lett* **80**: 183–188.
- Conrad R (1996) Soil microorganisms as controllers of atmospheric trace gases (H<sub>2</sub>, CO, CH<sub>4</sub>, OCS, N<sub>2</sub>O, and NO). *Microbiol Rev* **60**: 609–640.
- FAO (1988) FAO/Unesco soil map of the world revised legend, with corrections. World Soil, Resources, Report, 60, Rome (reprinted as technical paper 20, ISRIC, Wageningen, 1994).
- Ferguson SJ (1994) Denitrification and its control. *Antonie Van Leeuwenhoek* **66**: 89–110.
- Härtig E & Zumft W (1999) Kinetics of *nirS* expression (cytochrome *cd<sub>1</sub>* nitrite reductase) in *Pseudomonas stutzeri* during the transition from aerobic respiration to denitrification: evidence for a denitrification-specific nitrate- and nitrite-responsive regulatory system. *J Bacteriol* **181**: 161–166.
- Hayatsu M, Tago K & Saito M (2008) Various players in the nitrogen cycle: diversity and functions of the microorganisms involved in nitrification and denitrification. *Soil Sci Plant Nutr* **54**: 33–45.
- Hochstein LI, Betlach M & Kritikos G (1984) The effect of oxygen on denitrification during steady-state growth of *Paracoccus halodenitrificans*. *Arch Microbiol* **137**: 74–78.
- Højberg O, Binnerup SJ & Sørensen J (1997) Growth of silicone-immobilized bacteria on polycarbonate membrane filters, a technique to study microcolony formation under anaerobic conditions. *Appl Environ Microbiol* **63**: 2920–2924.
- Jiang QQ & Bakken LR (1999) Nitrous oxide production and methane oxidation by different ammonia-oxidizing bacteria. *Appl Environ Microbiol* **65**: 2679–2684.
- Ka JO, Urbance J, Ye RW, Ahn TY & Tiedje JM (1997) Diversity of oxygen and N-oxide regulation of nitrite reductases in denitrifying bacteria. *FEMS Microbiol Lett* **156**: 55–60.
- Knowles R (1982) Denitrification. *Microbiol Rev* **46**: 43–70.
- Körner H & Zumft WG (1989) Expression of denitrification enzymes in response to the dissolved-oxygen level and respiratory substrate in continuous culture of *Pseudomonas stutzeri*. *Appl Environ Microbiol* **55**: 1670–1676.
- Lloyd D (1993) Aerobic denitrification in soils and sediments – from fallacies to facts. *Trends Ecol Evol* **8**: 352–356.
- Lloyd D, Boddy L & Davies KJP (1987) Persistence of bacterial denitrification capacity under aerobic conditions – the rule rather than the exception. *FEMS Microbiol Ecol* **45**: 185–190.
- Molstad L, Dörsch P & Bakken LR (2007) Robotized incubation system for monitoring gases (O<sub>2</sub>, NO, N<sub>2</sub>O, N<sub>2</sub>) in denitrifying cultures. *J Microbiol Methods* **71**: 202–211.
- Nicol GW, Tscherko D, Chang L, Hammesfahr U & Prosser JI (2006) Crenarchaeal community assembly and microdiversity in developing soils at two sites associated with deglaciation. *Environ Microbiol* **8**: 1382–1393.
- Otte S, Grobden NG, Robertson LA & Jetten MSM (1996) Nitrous oxide production by *Alcaligenes faecalis* under transient and dynamic aerobic and anaerobic conditions. *Appl Environ Microbiol* **62**: 2421–2426.
- Patureau D, Zumstein E, Delgenes JP & Moletta R (2000) Aerobic denitrifiers isolated from diverse natural and managed ecosystems. *Microb Ecol* **39**: 145–152.
- Philippot L, Mirleau P, Mazurier S, Siblot S, Hartmann A, Lemanceau P & Germon JC (2001) Characterization and transcriptional analysis of *Pseudomonas fluorescens* denitrifying clusters containing the *nar*, *nir*, *nor* and *nos* genes. *Biochim Biophys Acta – Gene Struct Expression* **1517**: 436–440.
- Robertson LA & Kuenen JG (1984) Aerobic denitrification – a controversy revived. *Arch Microbiol* **139**: 351–354.
- Robertson LA & Kuenen JG (1990) Physiological and ecological aspects of aerobic denitrification, a link with heterotrophic nitrification. *Denitrification in Soil and Sediment* (Revsbech NP & Sørensen J, eds), pp. 91–104. Plenum Press, New York.
- Robertson LA, Cornelisse R, Devos P, Hadioetomo R & Kuenen JG (1989) Aerobic denitrification in various heterotrophic nitrifiers. *Antonie Van Leeuwenhoek J Microbiol* **56**: 289–299.
- Robertson LA, Dalsgaard T, Revsbech NP & Kuenen JG (1995) Confirmation of ‘aerobic denitrification’ in batch cultures, using gas chromatography and <sup>15</sup>N mass spectrometry. *FEMS Microbiol Ecol* **18**: 113–119.
- Sears HJ, Ferguson SJ, Richardson DJ & Spiro S (1993) The identification of a periplasmic nitrate reductase in *Paracoccus denitrificans*. *FEMS Microbiol Lett* **113**: 107–111.
- Shaw LJ, Nicol GW, Smith Z, Fear J, Prosser JI & Baggs EM (2006) *Nitrosospora* spp. can produce nitrous oxide via a nitrifier denitrification pathway. *Environ Microbiol* **8**: 214–222.
- Sognnes LS, Fystro G, Opstad SL, Arstein A & Borresen T (2006) Effects of adding moraine soil or shell sand into peat soil on physical properties and grass yield in western Norway. *Acta Agriculturae Scandinavica Section B-Soil Plant Sci* **56**: 161–170.
- Takaya N, Catalan-Sakairi MAB, Sakaguchi Y, Kato I, Zhou ZM & Shoun H (2003) Aerobic denitrifying bacteria that produce low levels of nitrous oxide. *Appl Environ Microbiol* **69**: 3152–3157.
- Wilhelm E, Battino R & Wilcock RJ (1977) Low-pressure solubility of gases in liquid water. *Chem Rev* **77**: 219–262.
- Zumft WG (1997) Cell biology and molecular basis of denitrification. *Microbiol Mol Biol Rev* **61**: 533–616.
